# Supplementary material for: Mesoporous Bioactive Glasses Incorporated into an Injectable Thermosensitive Hydrogel for Sustained Co-Release of Sr2+ Ions and N-Acetylcysteine
Source: MDPI journal article supplement (doi:10.3390/pharmaceutics14091890), 2022-09-07
Supplement: s1 [file s1]

# Mesoporous bioactive glasses incorporated into an injectable thermosensitive hydrogel for sustained co-release of Sr<sup>2+</sup> ions and N-acetylcysteine

Carlotta Pontremoli<sup>1,2</sup>, Monica Boffito<sup>3</sup>, Rossella Laurano<sup>3</sup>, Giorgio Iviglia<sup>4</sup>, Elisa Torre<sup>4</sup>, Clara Cassinelli<sup>4</sup>, Marco Morra<sup>4</sup>, Gianluca Ciardelli<sup>3</sup>, Chiara Vitale-Brovarone<sup>1</sup>, Sonia Fiorilli<sup>1\*</sup>

## Supporting information

### Table of content

**S1:** Chemical structures of poly(urethane) building blocks and scheme of the protocol adopted for NHP poly(urethane) synthesis.

**S2:** Scheme of the Boc deprotection protocol performed on NHP to obtain SHP.

**S3:** Optical images of L929 fibroblast cells grown under the insert containing SHP, SHP\_MBG and SHP\_MBG\_Sr for 72h; images of positive and negative control are also reported. Scale bar: 100 μm.

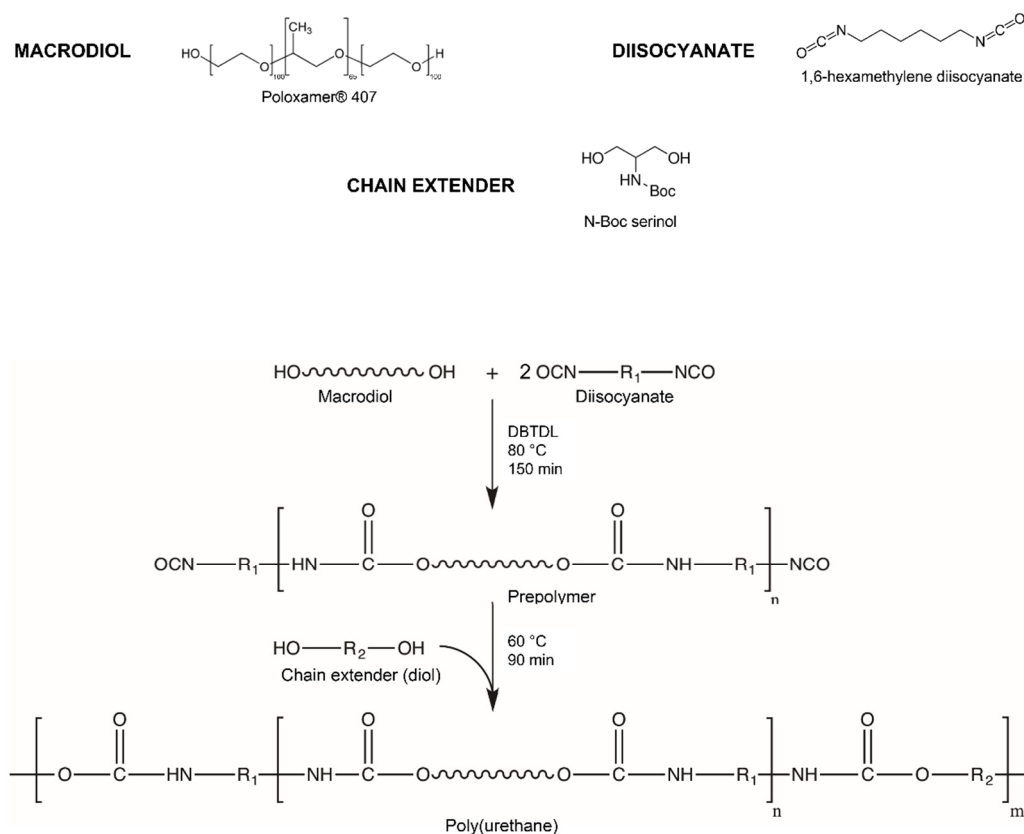

**Figure S1** Chemical structures of poly(urethane) building blocks and scheme of the protocol adopted for NHP poly(urethane) synthesis.

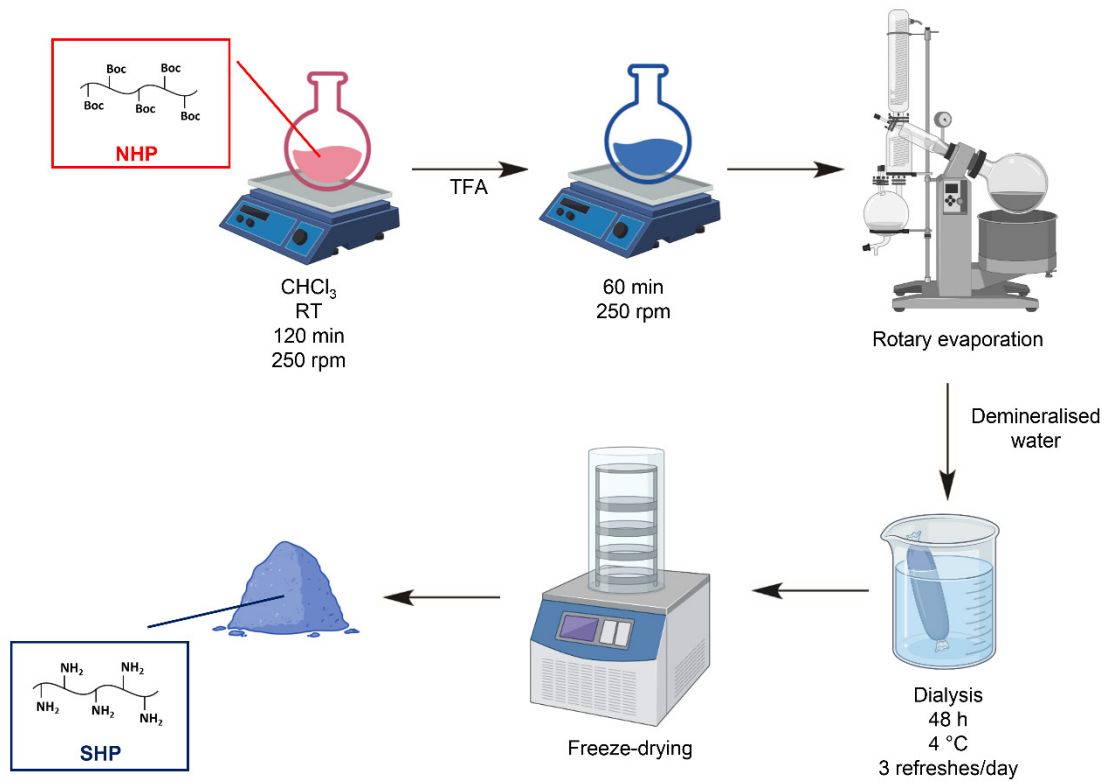

**Figure S2** Scheme of the Boc deprotection protocol performed on NHP to obtain SHP.

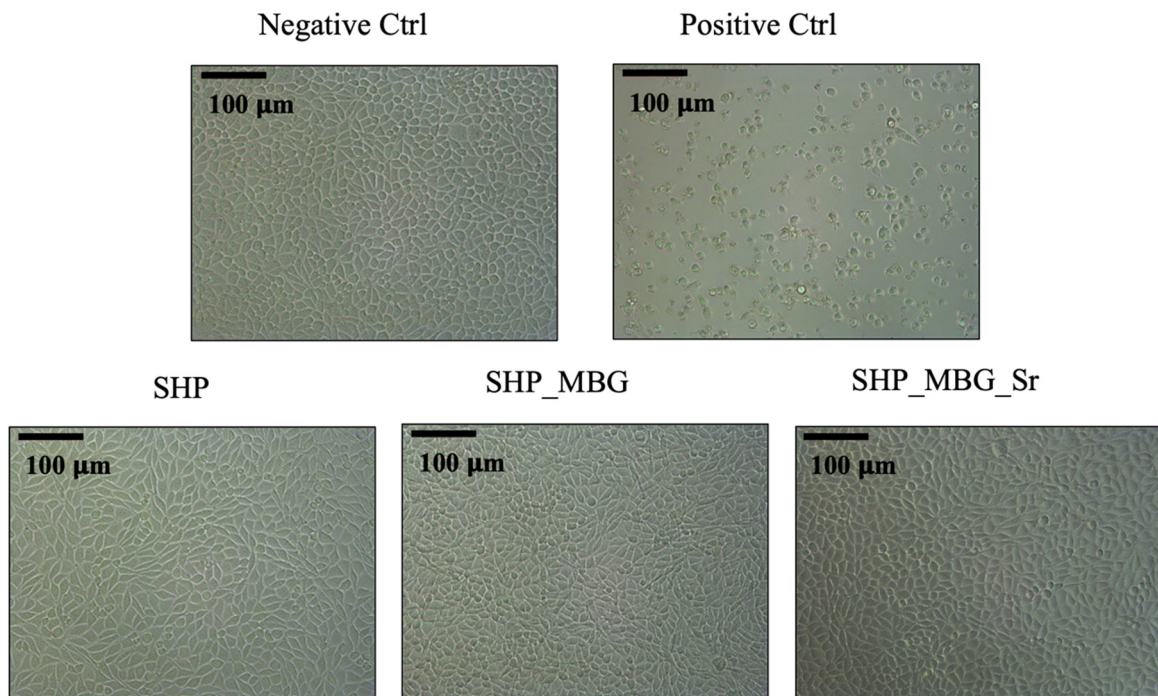

**Figure S3** Optical images of L929 fibroblast cells grown under the insert containing SHP, SHP\_MBG and SHP\_MBG\_Sr for 72h; images of positive and negative control are also reported. Scale bar: 100 µm.
